# Supplementary material for: Seropositivity and risk factors for SARS-CoV-2 infection in a South Asian community in Ontario: a cross-sectional analysis of a prospective cohort study
Source: PubMed Central journal article supplement — CMAJ Open. 2022 Jul 5;10(3):E599–609. doi: 10.9778/cmajo.20220031 (PMC9262348; doi:10.9778/cmajo.20220031), 2022-07-05
Supplement: open-2022-0031-1-at.pdf [file open-2022-0031-1-at.pdf]

# COVID CommUNITY - South Asian screening

Welcome and thank you for your interest in the COVID CommUNITY study.

This is an online consent form that you will need to complete to continue with the COVID CommUNITY study. Please read each section carefully.

A study team member should be with you to discuss the consent with you and answer any questions you may have.

Thank you and please do not hesitate to contact the study team if you have any questions.

## CONTACT INFORMATION

TODAY

\_\_\_\_\_

[name\_text]

\_\_\_\_\_

Name question text.

\_\_\_\_\_

Are you at least 18 years old?

- Yes
- No

Do you self-identify as South Asian?

- Yes
- No

Email address

\_\_\_\_\_

OPTIONAL: Email address of Witness (Translator)

\_\_\_\_\_

If you would like to have someone you know and trust read the consent form with you to make sure you fully understand it before signing, please enter their email address here. This email address will only be used to send them the consent form to read and sign as a witness.

Where did you find out about us?

- Brampton soccer centre immunization clinic
- Embassy Grand Convention Centre immunization clinic
- Embassy Grand Convention Centre Testing Site
- Through another study
- Social Media
- Word of mouth (friend or family)
- Pharmacy
- Other, specify: \_\_\_\_\_

Where did you find out about us?

- BC pop up clinics
- Through another study
- Social Media
- Place of Worship
- Other, please specify: \_\_\_\_\_

Appendix 1, as supplied by the authors. Appendix to: Anand SS, Arnold C, Bangdiwala SI, et al. Seropositivity and risk factors for SARS-CoV-2 infection in a South Asian community in Ontario: a cross-sectional analysis of a prospective cohort study. *CMAJ Open* 2022. doi: 10.9778/cmajo.20220031. Copyright © 2022 The Author(s) or their employer(s). To receive this resource in an accessible format, please contact us at [cmajgroup@cmaj.ca](mailto:cmajgroup@cmaj.ca).

---

Please specify which social media platform you were on when you heard about us:

- Facebook
- Instagram
- Twitter
- WhatsApp
- Other, please specify: \_\_\_\_\_

---

Is this your final COVID-19 vaccine dose?

- Yes
- No

---

Which study are you already a part of?

- SAHARA
- START
- RICH Legacy
- Canadian Alliance for Healthy Hearts and Minds (CAHHM)

---

Which study are you already a part of?

- SAHARA
- MCHAT
- RICH Legacy

---

DAG

\_\_\_\_\_

---

Study ID

\_\_\_\_\_

---

Parent Cohort Referral number

\_\_\_\_\_

---

Sorry, you are not eligible to participate in this study.  
Thank you for your interest.
